# Supplementary material for: The base discriminating potential of pyrrolidinyl PNA demonstrated by magnetic FexOy particles
Source: Royal Society of Chemistry journal article supplement (doi:10.1039/c4ob00487f), 2014-01-01
Supplement: c4ob00487f1.pdf [file c4ob00487f1.pdf]

## Supporting Information

# The base discriminating potential of pyrrolidinyl PNA demonstrated by magnetic Fe<sub>x</sub>O<sub>y</sub> particles

Claudia Stubinitzky,<sup>a</sup> Tirayut Vilaivan<sup>\*b</sup> and Hans-Achim Wagenknecht<sup>\*a</sup>

Institute of Organic Chemistry, Karlsruhe Institute of Technology (KIT), Fritz-Haber-Weg 6, 76131 Karlsruhe, Germany. Fax: +49-721-608-44825; Tel: +49-721-608-47486; E-mail: Wagenknecht@kit.edu

Organic Synthesis Research Unit, Department of Chemistry, Faculty of Science, Chulalongkorn University, Phayathai Road, Patumwan, Bangkok 10330, Thailand, Fax: 02-2187598 Tel: 02-2187627 ext 101 E-mail: vtirayut@chula.ac.th

| <b>Contents</b>                                            | <b>Page</b> |
|------------------------------------------------------------|-------------|
| 1. Materials and methods                                   | 2           |
| 2. PNA/DNA sequences and melting temperatures              | 8           |
| 3. Spectroscopic analysis of capture experiments           | 10          |
| 3.1. General remarks                                       | 10          |
| 3.2. Immobilisation of biotinylated oligonucleotides       | 10          |
| 3.3. UV/Vis absorption spectroscopy of capture experiments | 10          |
| 4. References                                              | 12          |

## 1. Materials and Methods

DNA0-DNA5 have been purchased from metabion international AG, DNA6-9 from biomers.net GmbH and pierce streptavidin magnetic beads from Thermo Fisher Scientific (Streptavidin monolayer covalently coupled to magnetic bead surface, bead concentration: 10mg/ml, binding capacity: ~ 3500 pmol biotinylated fluorescein/mg of beads).

### Structures of Atto488 and DY649

DY649

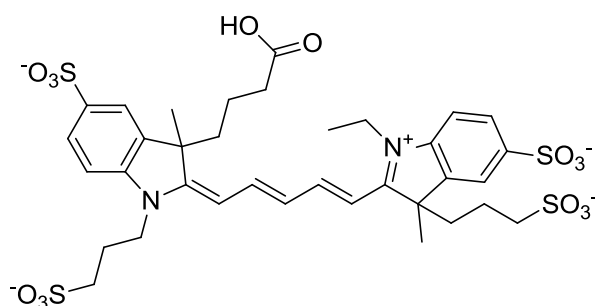

Atto488

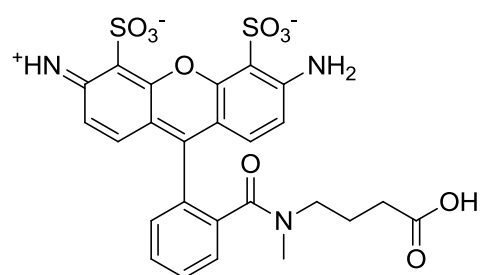

### Synthesis of PNA1-PNA5

The PNAs were synthesized manually by Fmoc-solid phase peptide synthesis on TentaGel S RAM resin (0.24 mmol/g substitution, 1.5  $\mu$ mol for PNA2 and 1  $\mu$ mol for PNA1,3-5) preloaded with Lys(Boc) using the standard protocol.<sup>[1,2]</sup> Apcp PNA was modified at the N-terminus with biotin via two aminoethoxyethoxyacetyl linkers. The nucleobase protecting groups (Bz and Ibu) were removed by  $\text{NH}_4\text{OH}$ :dioxane (1:1) treatment at 60  $^\circ\text{C}$  overnight. Cleavage of the PNA oligomers from the resin was achieved by treatment with trifluoroacetic acid (TFA). After precipitation with diethyl ether, the PNAs were purified by reverse phase HPLC using the following conditions: A = 0.1% TFA in water; B = 0.1% TFA in MeOH; gradient = 0-80% B over 70 min. The collected fractions were lyophilized and quantified by their absorbance at 260 nm. Identity was verified by MS (MALDI) in the linear negative mode (matrix: saturated CCA solution with  $\text{H}_2\text{O}$ :acetonitrile (1:1) + 0.1 % TFA) and purity was verified by analytical reverse phase HPLC.

## PNA1

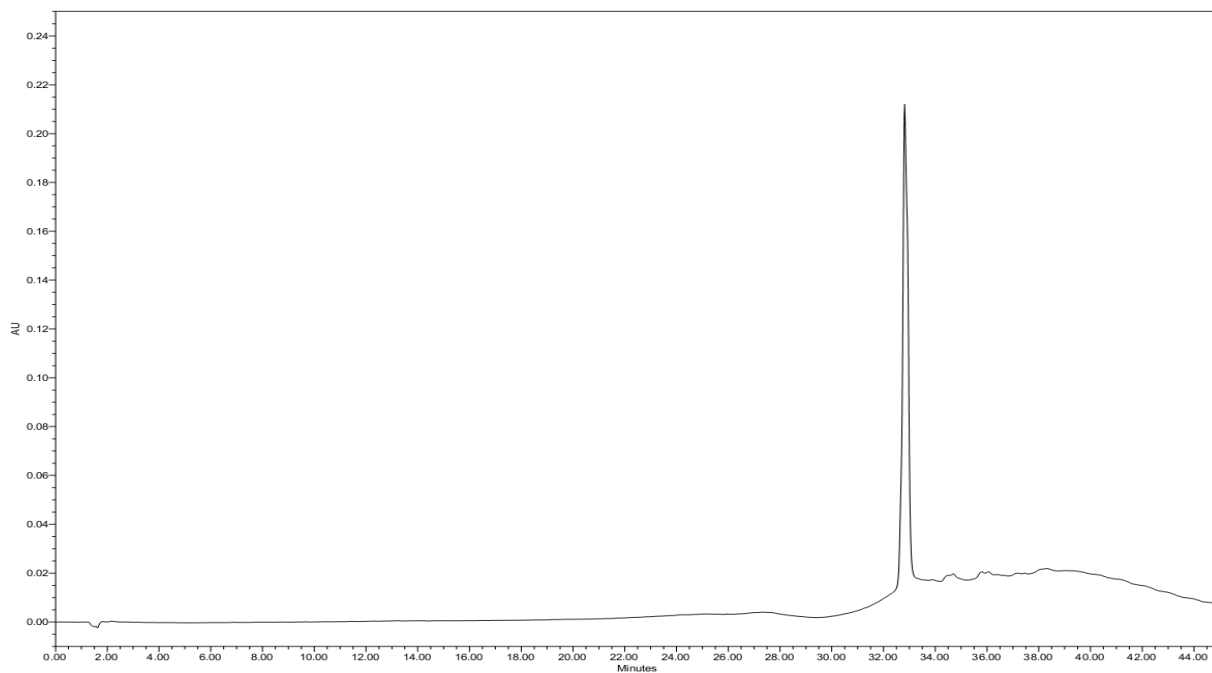

(HPLC conditions: C18 column 4.6×50 mm 3  $\mu$ , gradient H<sub>2</sub>O:MeOH containing 0.1% TFA 90:10 for 5 min then linear gradient to 10:90 over 30 min, 260 nm)

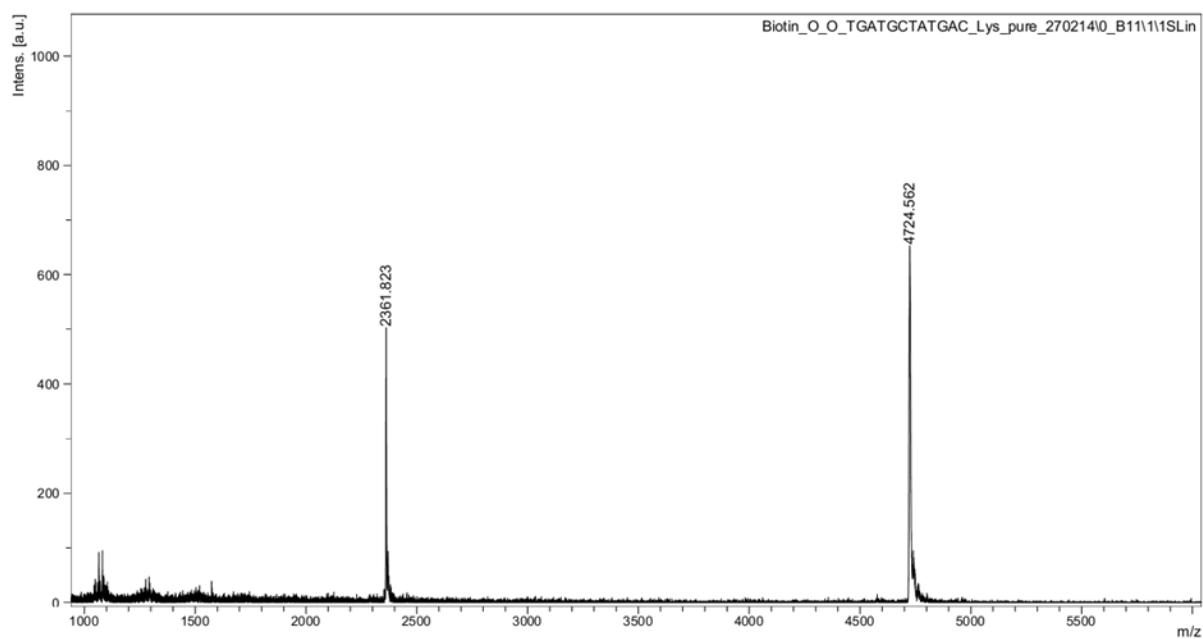

$M \cdot H^+$  (calculated) = 4723.1 g/mol

$M \cdot H^+$  (found) = 4724.6 g/mol

$[M \cdot 2H]^{2+}$  (calculated) = 2362.1 g/mol

$[M \cdot 2H]^{2+}$  (found) = 2361.8 g/mol

# PNA2

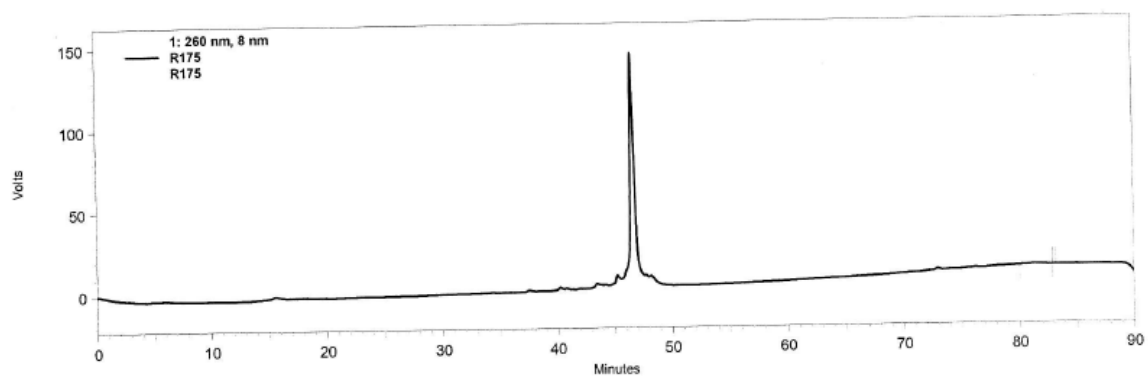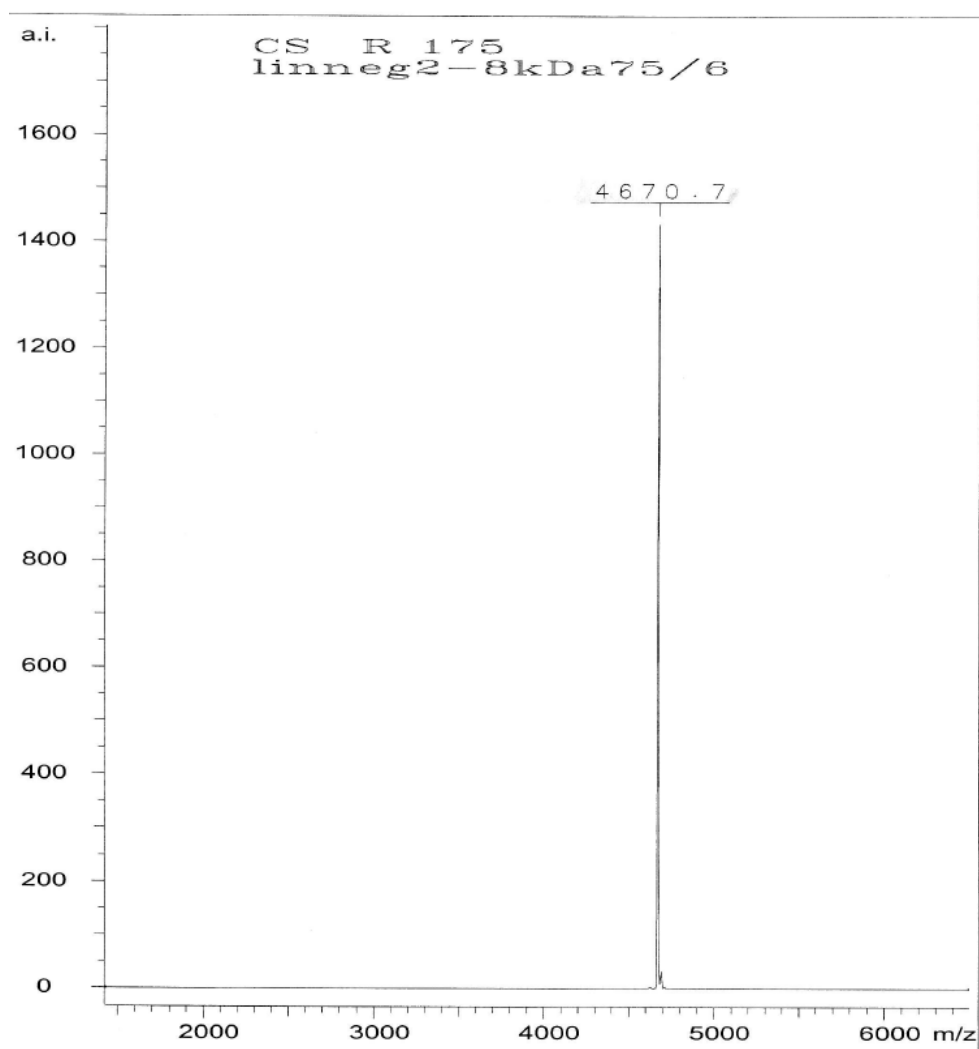

$M \cdot H^+$  (calculated) = 4670.1 g/mol

$M \cdot H^+$  (found) = 4670.7 g/mol

# PNA3

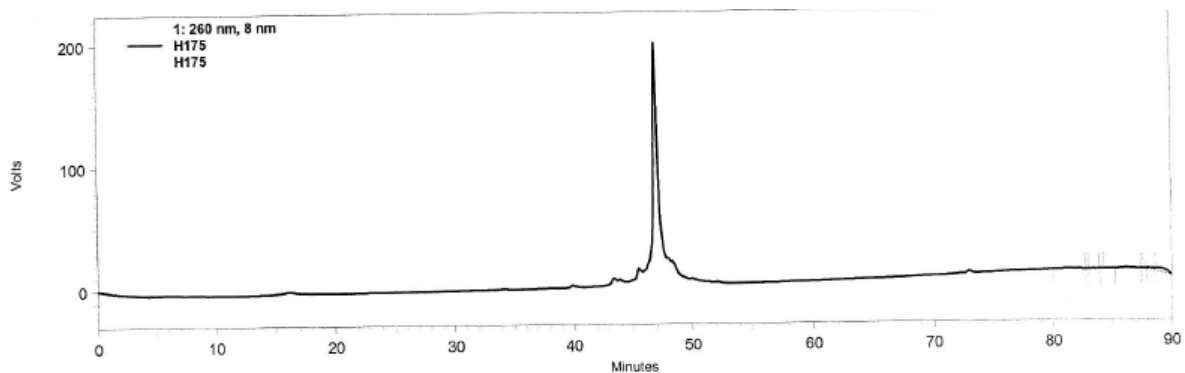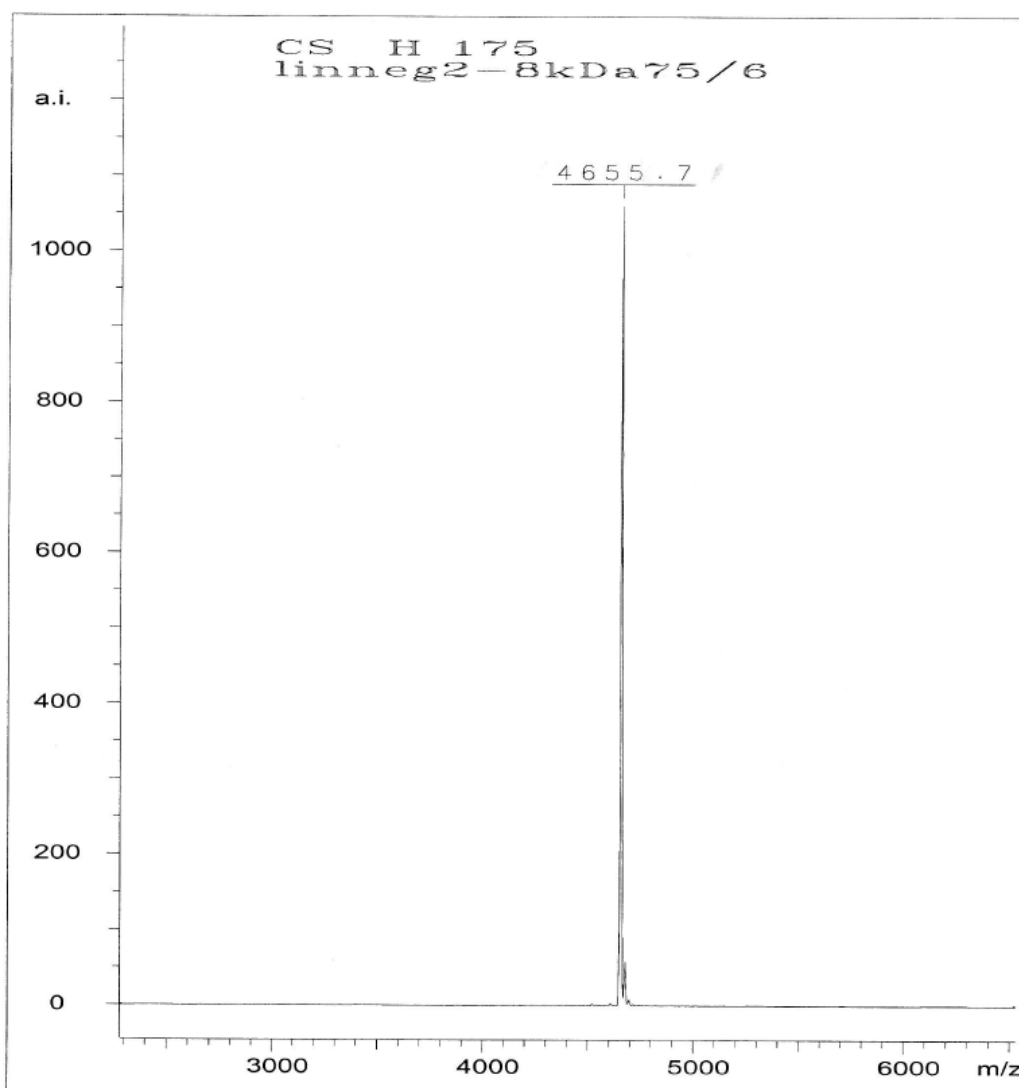

$M \cdot H^+$  (calculated) = 4654.1 g/mol

$M \cdot H^+$  (found) = 4655.7 g/mol

# PNA4

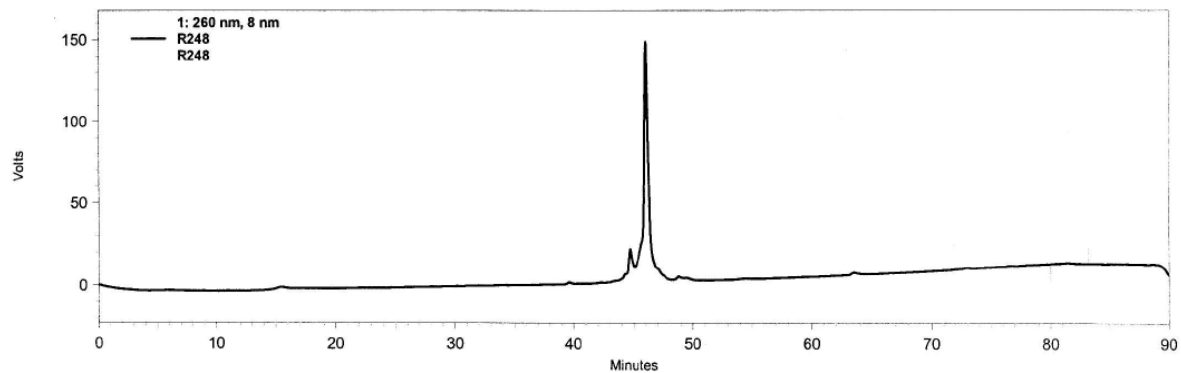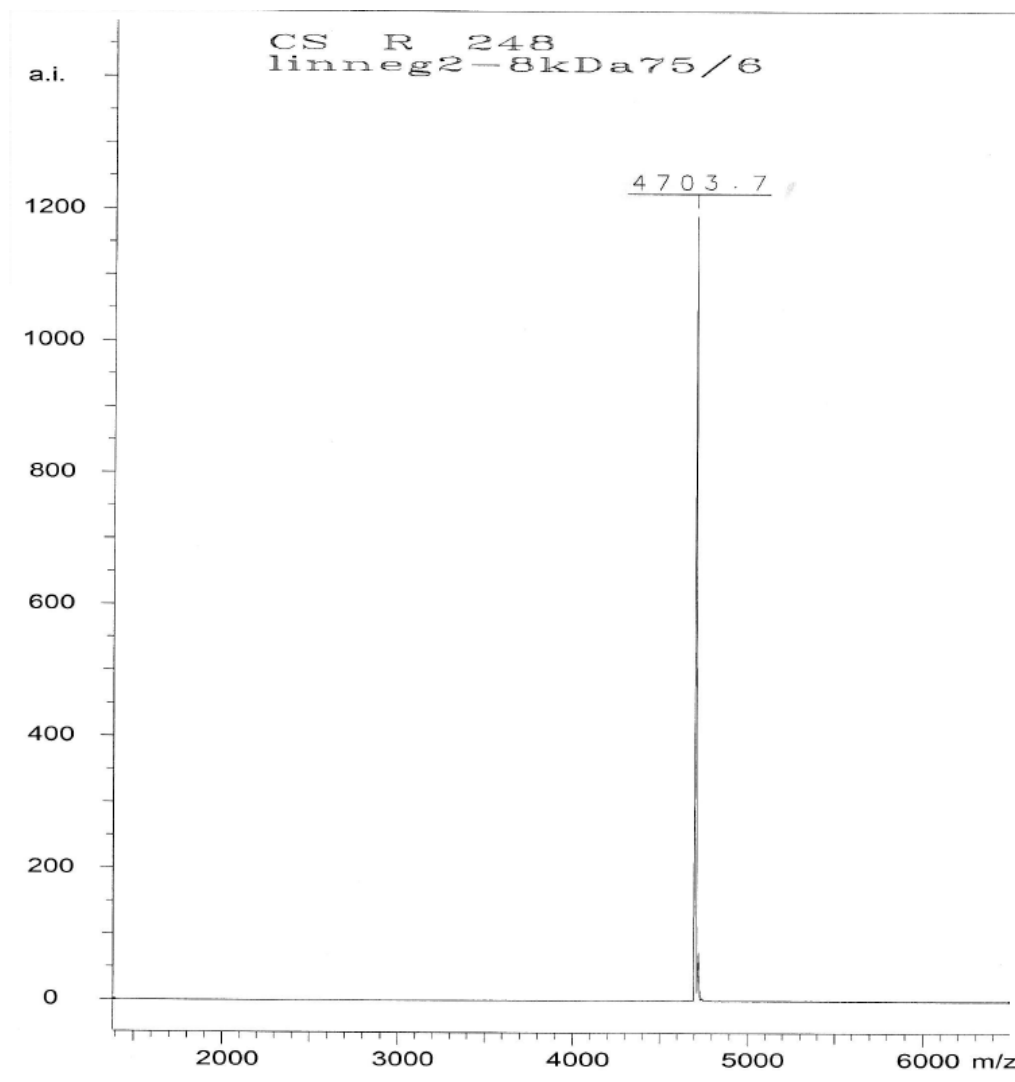

$M \cdot H^+$  (calculated) = 4703.1 g/mol

$M \cdot H^+$  (found) = 4703.7 g/mol

# PNA5

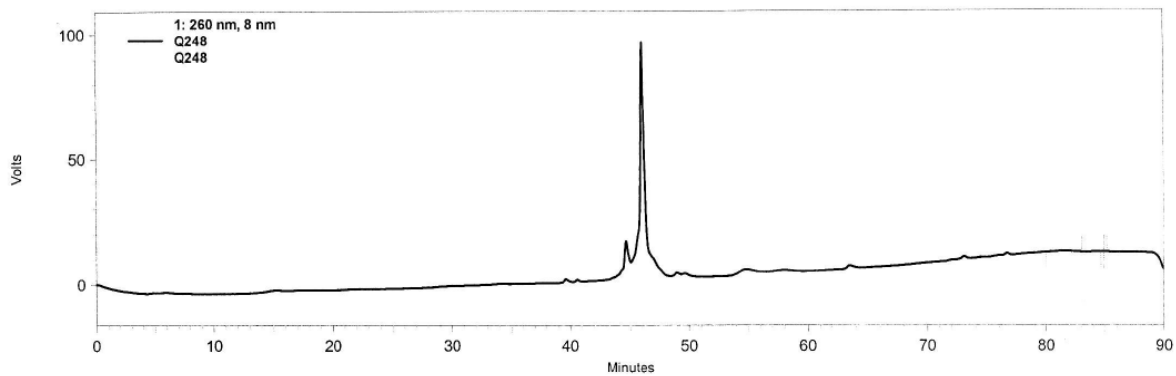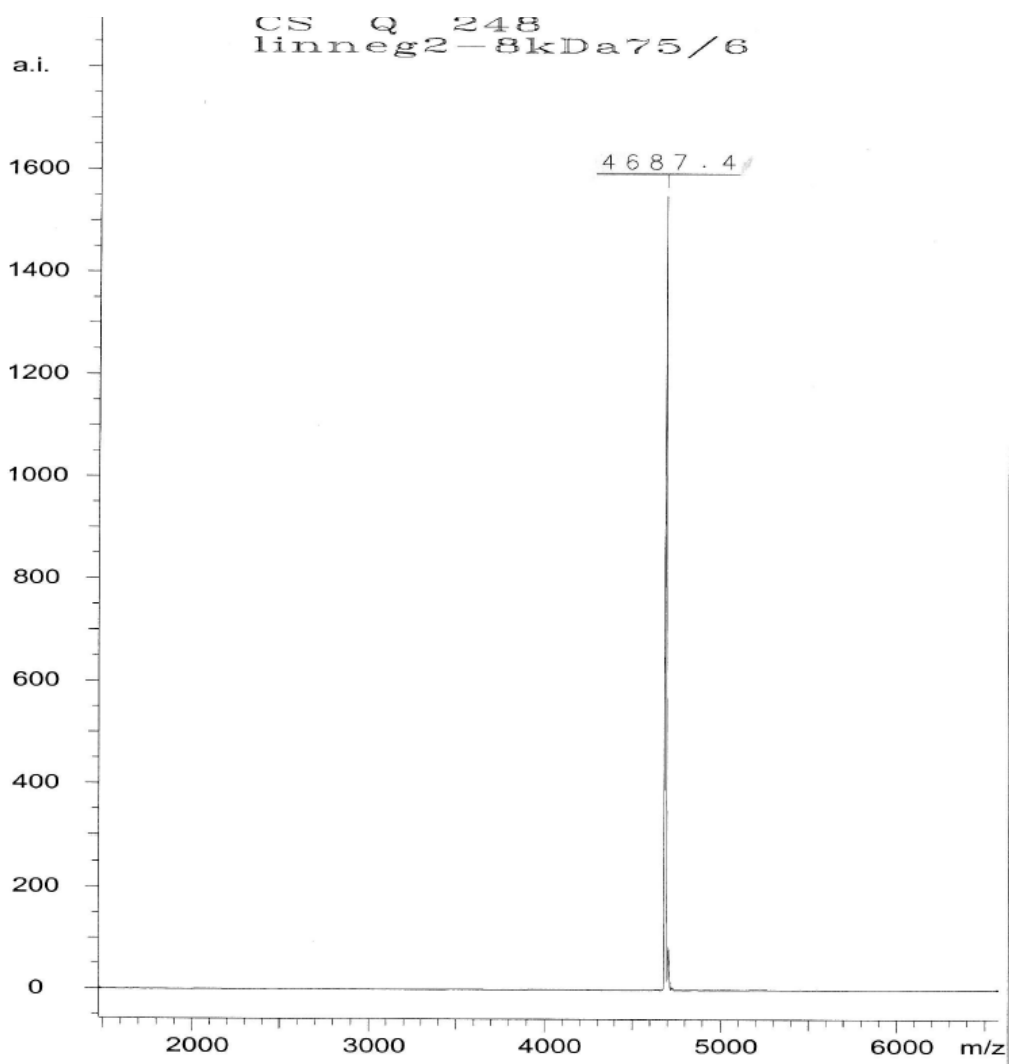

$M \cdot H^+$  (calculated) = 4687.1 g/mol

$M \cdot H^+$  (found) = 4687.4 g/mol

## 2. PNA/DNA sequences and melting temperatures

**Table S1:** Sequences concerning R175H mutation

|              |                                                      |
|--------------|------------------------------------------------------|
| <b>PNA2:</b> | Biotin-O-O-AGG <b>CGCT</b> GGCCCC-LysNH <sub>2</sub> |
| <b>PNA3:</b> | Biotin-O-O-AGG <b>CACT</b> GGCCCC-LysNH <sub>2</sub> |
| <b>DNA10</b> | 5'-TGCGGGGCA <b>CGC</b> CCT-3'                       |
| <b>DNA11</b> | 5'-TGCGGGGCA <b>GTG</b> CCT-3'                       |
| <b>DNA12</b> | 5'-AGG <b>CGCT</b> GGCCCC-3'                         |
| <b>DNA13</b> | 5'-AGG <b>CACT</b> GGCCCC-3'                         |

**Table S2:** Sequences concerning R248Q mutation

|              |                                                      |
|--------------|------------------------------------------------------|
| <b>PNA4</b>  | Biotin-O-O-AAC <b>CGG</b> AGGCCCC-LysNH <sub>2</sub> |
| <b>PNA5</b>  | Biotin-O-O-AAC <b>CAG</b> AGGCCCC-LysNH <sub>2</sub> |
| <b>DNA14</b> | 5'-TGCGGGCCT <b>CCG</b> GTT-3'                       |
| <b>DNA15</b> | 5'-TGCGGGCCT <b>CTG</b> GTT-3'                       |
| <b>DNA16</b> | 5'-AAC <b>CGG</b> AGGCCCC-3'                         |
| <b>DNA17</b> | 5'-AAC <b>CAG</b> AGGCCCC-3'                         |

### Melting temperatures

$T_m$  were recorded with a Varian Cary 100 spectrometer using 2.5  $\mu$ M PNA-DNA / DNA-DNA solutions in 10 mM NaP<sub>i</sub> buffer (pH =7) and 250 mM NaCl:  $\lambda$  = 260 nm, 10-90 °C, interval: 0.7 °C/min.

**Table S3:**  $T_m$  of PNA2-3, DNA12-13 with DNA10-11

| PNA          | DNA          | $T_m$ [°C] |                          |
|--------------|--------------|------------|--------------------------|
| <b>PNA2</b>  | <b>DNA10</b> | 69.2       | } $\Delta T_m = 16.0$ °C |
| <b>PNA2</b>  | <b>DNA11</b> | 53.2       |                          |
| <b>PNA3</b>  | <b>DNA10</b> | 36.3       | } $\Delta T_m = 33.5$ °C |
| <b>PNA3</b>  | <b>DNA11</b> | 69.8       |                          |
| <b>DNA12</b> | <b>DNA10</b> | 66.3       | } $\Delta T_m = 10.6$ °C |
| <b>DNA12</b> | <b>DNA11</b> | 55.8       |                          |
| <b>DNA13</b> | <b>DNA10</b> | 43.1       | } $\Delta T_m = 19.2$ °C |
| <b>DNA13</b> | <b>DNA11</b> | 62.3       |                          |



**Table S4:  $T_m$  of PNA2-3 with DNA2-3/DNA6-7**

| PNA  | DNA  | $T_m$ [°C] |                          |
|------|------|------------|--------------------------|
| PNA2 | DNA2 | 65.1       | } $\Delta T_m = 15.5$ °C |
| PNA2 | DNA3 | 49.6       |                          |
| PNA2 | DNA6 | 67.4       | } $\Delta T_m = 11.4$ °C |
| PNA2 | DNA7 | 56.0       |                          |
| PNA3 | DNA2 | 29.3       | } $\Delta T_m = 34.8$ °C |
| PNA3 | DNA3 | 64.1       |                          |
| PNA3 | DNA6 | 35.9       | } $\Delta T_m = 38.0$ °C |
| PNA3 | DNA7 | 73.9       |                          |

**Table S5:  $T_m$  of PNA4-5, DNA16-17 with DNA14-15**

| PNA   | DNA   | $T_m$ [°C] |                          |
|-------|-------|------------|--------------------------|
| PNA4  | DNA14 | 70.0       | } $\Delta T_m = 13.4$ °C |
| PNA4  | DNA15 | 56.6       |                          |
| PNA5  | DNA14 | 47.2       | } $\Delta T_m = 21.1$ °C |
| PNA5  | DNA15 | 68.3       |                          |
| DNA16 | DNA14 | 63.9       | } $\Delta T_m = 10.4$ °C |
| DNA16 | DNA15 | 53.5       |                          |
| DNA17 | DNA14 | 45.9       | } $\Delta T_m = 15.2$ °C |
| DNA17 | DNA15 | 61.1       |                          |

**Table S6:  $T_m$  of PNA4-5 with DNA4-5/DNA8-9**

| PNA  | DNA  | $T_m$ [°C] |                          |
|------|------|------------|--------------------------|
| PNA4 | DNA4 | 70.7       | } $\Delta T_m = 15.1$ °C |
| PNA4 | DNA5 | 55.6       |                          |
| PNA4 | DNA8 | 70.5       | } $\Delta T_m = 13.4$ °C |
| PNA4 | DNA9 | 57.1       |                          |
| PNA5 | DNA4 | 43.3       | } $\Delta T_m = 25.5$ °C |
| PNA5 | DNA5 | 68.8       |                          |
| PNA5 | DNA8 | 46.3       | } $\Delta T_m = 23.1$ °C |
| PNA5 | DNA9 | 69.4       |                          |

### 3. Spectroscopic analysis of capture experiments

#### 3.1. General remarks

All absorption spectra were recorded with a Varian Cary 100 spectrometer using 2.5  $\mu\text{M}$  solutions ( $V = 1 \text{ mL}$ ) in 10 mM  $\text{NaP}_i$  buffer ( $\text{pH} = 7$ ) and 250 mM  $\text{NaCl}$  at  $20^\circ\text{C}$ , except otherwise mentioned. Oligonucleotide solutions were added to particles, after shaking they were kept for a certain time (specified in spectra). After capturing the  $\text{Fe}_x\text{O}_y$  particles with a magnet, the absorbance of the supernatant was measured spectrophotometrically.

#### 3.2. Immobilisation of biotinylated oligonucleotides and biotinylated PNA

150  $\mu\text{L}$  of magnetic streptavidin coated  $\text{Fe}_x\text{O}_y$  particles (marked with “P” in the spectra) were added into an Eppendorf tube and washed three times with milliQ water ( $3 \times 1 \text{ mL}$ ). Afterwards the biotinylated oligonucleotide (DNA0 or biotinylated PNA) was added for immobilization for 15min.

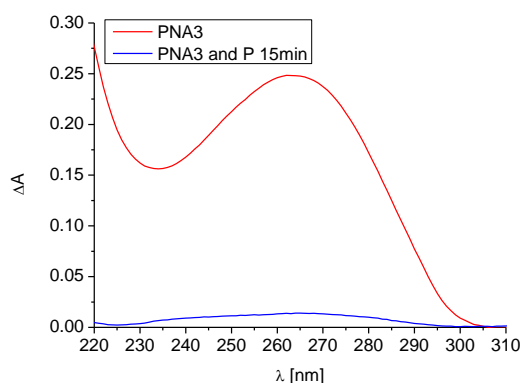

**Figure S1:** Immobilisation of **PNA3** on  $\text{Fe}_x\text{O}_y$  particles.

#### 3.3. UV/Vis absorption spectroscopy of capture experiments

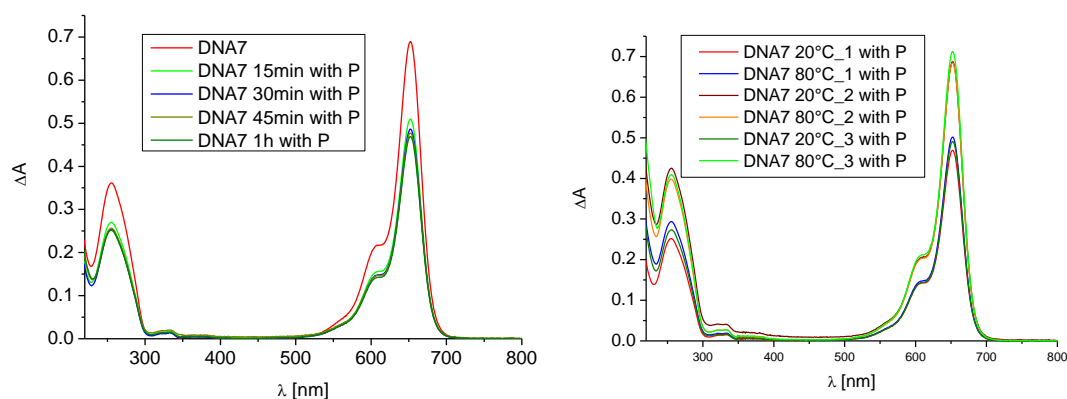

**Figure S2:** Measurements of **DNA7** with **PNA3** bearing particles.

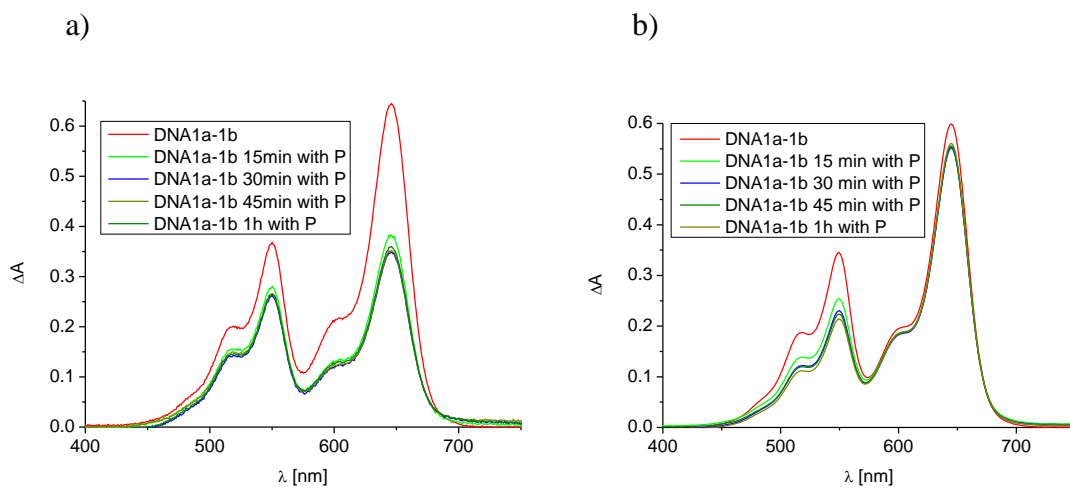

**Figure S3:** Measurements with a) **DNA0** and b) **PNA1** bearing particles.

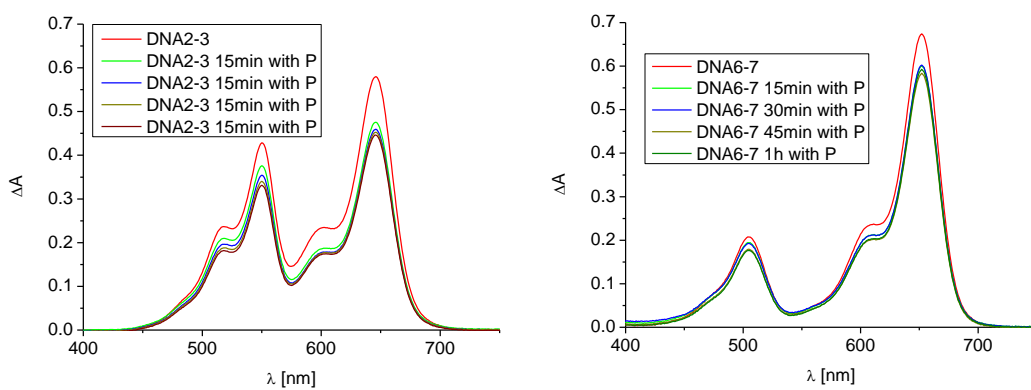

**Figure S4:** Measurements with **PNA2** bearing particles.

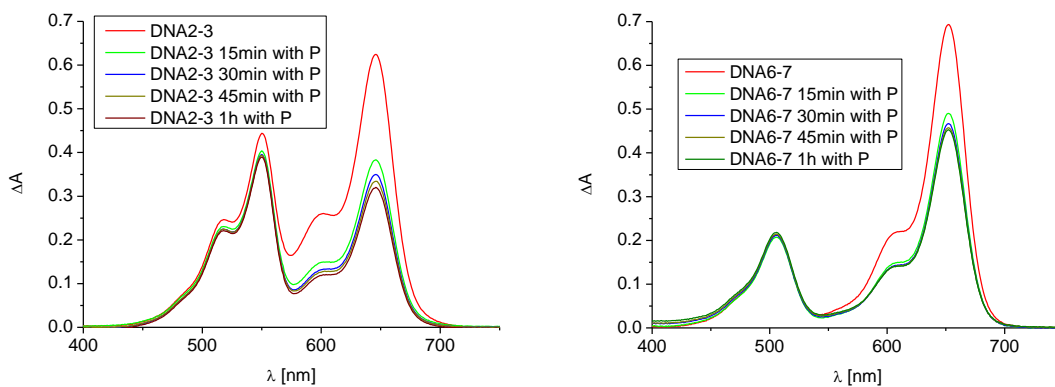

**Figure S5:** Measurements with **PNA3** bearing particles.

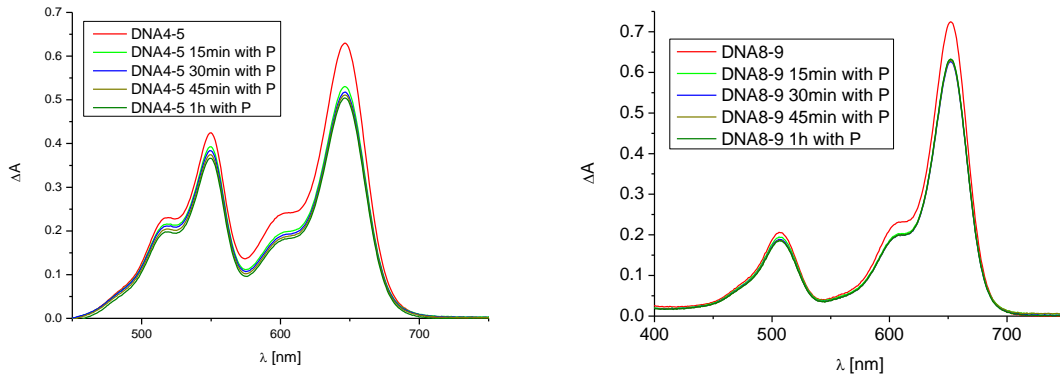

**Figure S6:** Measurements with **PNA4** bearing particles.

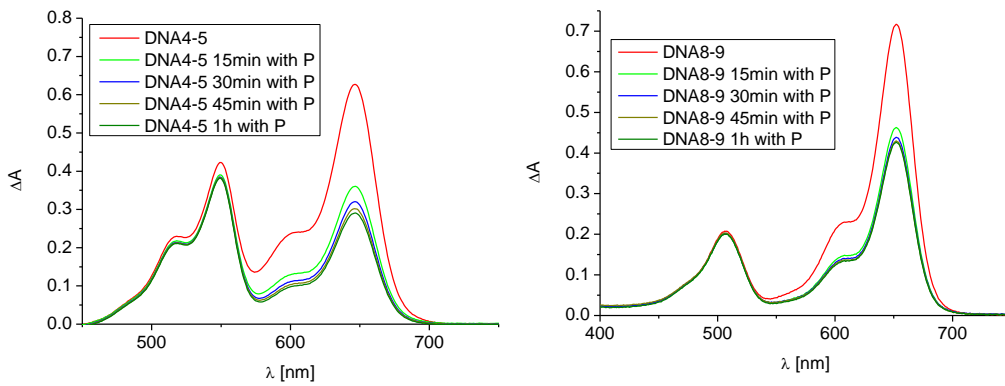

**Figure S7:** Measurements with **PNA5** bearing particles.

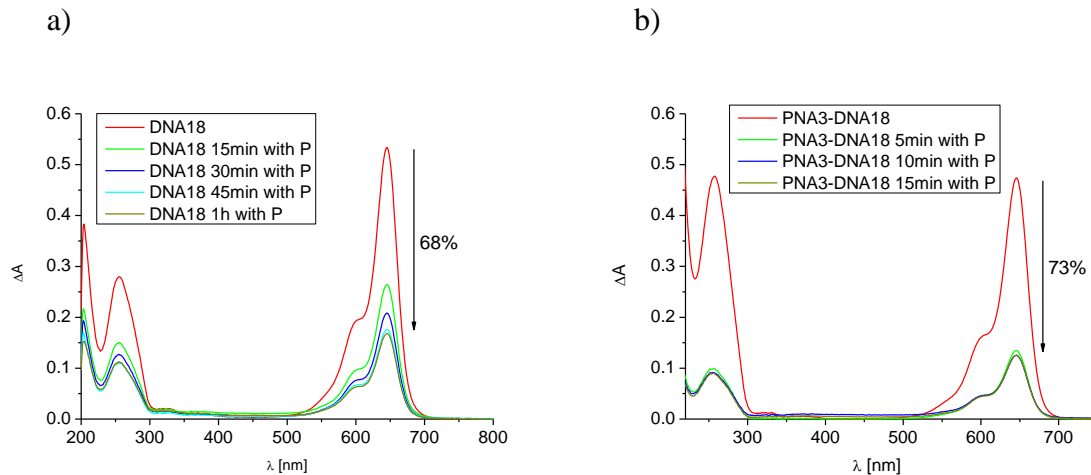

**Figure S8:** Hybridization control experiment of **DNA18** (5'-Cy5-GGGGCAGTGCCT-3') and **PNA3**: (a) Equimolar hybridization of **DNA18** with **PNA3** bearing particles, (b) Hybridization of **DNA18** (1 equiv.) with excess of **PNA3** (1.2 equiv.) and subsequent immobilization on the streptavidin coated particles.

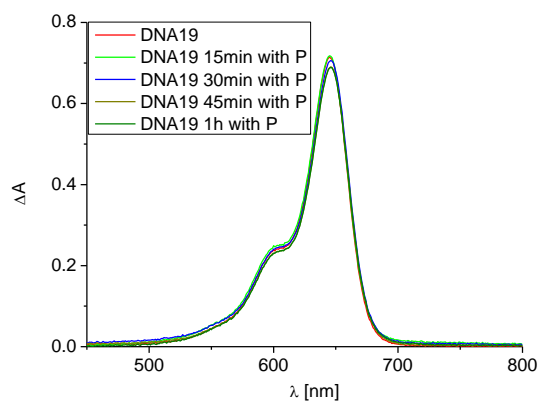

**Figure S9:** Control experiment using „non-sense“ **DNA19** (5′-Cy5-GATAGTCTCATCGTC-3′) and magnetic particles bearing non-complementary **DNA20** (5′-Biotin-GTACTGTGACTGATGCTGTGACGCA-3′).

#### 4. References

- [1] T. Vilaivan and C. Srisuwannaket, *Org. Lett.* **2006**, *8*, 1897.
- [2] C. Vilaivan, C. Srisuwannaket, C. Ananthanawat, C. Suparpprom, J. Kawakami, Y. Yamaguchi, Y. Tanaka and T. Vilaivan, *Artificial DNA: PNA & XNA* **2011**, *2*, 50.
